# Effect of flagellar beating pattern on sperm rheotaxis and boundary-dependent navigation

Meisam Zaferani<sup>1</sup>, Farhad Javi<sup>1</sup>, Amir Mokhtare<sup>1</sup>, Alireza Abbaspourrad<sup>1</sup>†

<sup>1</sup> Department of Food Science, College of Agriculture and Life Sciences, Cornell University,

Ithaca, NY, 14850, USA

† Corresponding author: [alireza@cornell.edu](mailto:alireza@cornell.edu)

## Abstract

The study of navigational mechanisms used by mammalian sperm inside a microenvironment yields better understanding of sperm locomotion during the insemination process, which aids in the design of tools for overcoming infertility. Near- and far-field hydrodynamic interactions with nearby boundaries and rheotaxis are known to be some of the steering strategies that keep sperm on the correct path toward the egg. However, it is not known how the beating patterns of sperm may influence these navigational strategies. In this study, we investigate the effect of flagellar beating pattern on navigation of sperm cells both theoretically and experimentally using a two-step approach. We first isolate bovine sperm based on their rheotactic behavior in a zone with quiescent medium using a microfluidic system. This step ensures that the swimmers are able to navigate upstream and have motilities higher than a selected value, even though they feature various flagellar beating patterns. We then explore the flagellar beating pattern of these isolated sperm and their subsequent influence on boundary-dependent navigation. Our findings indicate that rheotaxis enables sperm to navigate upstream even in the presence of circular motion in their motility, whereas boundary-dependent navigation is more sensitive to the circular motion and selects for progressive motility. This finding may explain the clinical importance of progressive

23 motility in semen samples for fertility, as the flow of mucus may not be sufficiently strong to orient  
24 the sperm cells throughout the process of insemination.

25 **Keywords:** Mammalian sperm | Navigation | Rheotaxis | Boundary-dependent navigation |  
26 Progressive motility

## 27 **Significance**

28 Finding the egg and moving toward it while traversing the complex structure of the female  
29 reproductive tract is necessary for mammalian sperm. Previous studies have shown how sperm use  
30 navigational steering mechanisms that are based on swimming upstream (i.e. rheotaxis) and along  
31 the boundaries of the female reproductive tract. We demonstrate that the performance of these  
32 navigational mechanisms is associated with the primary characteristics of sperm motility. In fact,  
33 sperm rheotaxis is more sensitive to the motility and thus average velocity of sperm while  
34 navigation via rigid boundaries is more sensitive to the flagellar beating pattern and selects for  
35 symmetric beating. Our results can be expanded to other autonomous microswimmers and their  
36 subsequent navigation mechanisms.

37

38

39

40

41

42

43

## 44 **Introduction**

45 For successful fertilization, sperm cells must traverse the distance between the location of  
46 semen deposition and the egg (1). During this transport, sperm cells require navigational  
47 mechanisms to find the correct direction in which to move (2). These navigational mechanisms  
48 rely on external stimuli, including chemical (3–5), thermal (6), and fluid mechanical (7–9) clues,  
49 which vary among different species. For instance, marine plants and animals (10, 11) release their  
50 gametes into the sea, where chemotactic behavior is observed (4, 11–13). Strikingly, the role of  
51 this chemical communication observed in marine invertebrate sperm (which is reminiscent of  
52 bacterial chemotaxis (14)) is uncertain in the navigation of mammalian sperm (13, 15–19). In  
53 contrast, *in vitro/vivo* evidence suggests that the navigation of mammalian sperm within the female  
54 reproductive tract depends more on fluid mechanical clues rather than other external stimuli (2, 7,  
55 9, 20, 21).

56 The navigational system of mammalian sperm to find the correct path toward the  
57 fertilization site includes boundary-dependent navigation (20–22) and upstream swimming  
58 behavior, known as “rheotaxis” (8, 23, 24). Based on extensive studies carried out previously, the  
59 characteristics of rheotactic behavior are determined by the external flow in which the sperm are  
60 swimming, and a minimum shear rate is required for upstream swimming to emerge (23).  
61 However, boundary-dependent navigation that relies upon the hydrodynamic interactions of the  
62 swimmer with rigid walls, as well as self-propulsion and steric repulsion of sperm cells (25), is  
63 independent of the external flow and exists even in a quiescent medium. In fact, boundary-  
64 dependent navigation consists of a far-field hydrodynamic attraction of the sperm toward nearby  
65 walls (26–29), such as those of the female reproductive tract, followed by stably swimming along  
66 these boundaries (20, 21, 37, 22, 30–36). Berke et al. (27) proposed a dipole swimmer model that

67 describes the attraction of sperm as a microswimmer with absolute progressive motility toward  
68 rigid boundaries at distances far enough from the boundaries (i.e., the far-field approximation). At  
69 close distances, swimming along boundaries is observed ubiquitously among microswimmers and  
70 Denissenko et al. (20) have demonstrated this boundary-following motion in the sperm using a  
71 microchannel and proposed it as a navigational mechanism.

72         Although sperm rheotaxis and boundary-dependent navigation have been studied, the  
73 intriguing unanswered question is how does the flagellar beating pattern affect these navigational  
74 mechanisms? Since sperm cells in a population feature both progressive and non-progressive  
75 motility, answering this question reveals the optimum motility mode required for sperm to be  
76 steered by such navigational mechanisms. Previous studies have explored sperm flagellar beating  
77 and its hydrodynamic interaction with rigid boundaries (20, 38, 39). However, such studies have  
78 not revealed the role of the beating pattern in sperm navigation comprehensively because they  
79 have not considered sperm rheotaxis. The dynamic flow of mucus within the female reproductive  
80 tract necessitates studying the effect of the flagellar beating pattern on sperm rheotaxis and  
81 boundary-dependent navigation concurrently. Therefore, controlled experimentation to quantify  
82 the effect of the beating pattern on different sperm navigational mechanisms is desirable. However,  
83 at shear rates at which upstream swimming occurs, characterizing the role of the beating pattern  
84 in the sperm locomotion and subsequent interactions is challenging as the flow overcomes all the  
85 non-upstream components of the motion. Furthermore, decoupling the contribution of the flow  
86 and the beating in the sperm motion is experimentally challenging in itself.

87         In this study, we investigate the navigation of sperm cells both theoretically and  
88 experimentally using a two-step approach. The first step is to isolate the sperm cells in a reservoir  
89 with quiescent medium via a rheotaxis-based method using a microfluidic system (40). This

90 microfluidic rheotaxis-based isolation step ensures that all sperm cells navigate upstream via  
91 rheotaxis and have motilities higher than a selected threshold value, even though they feature  
92 various flagellar beating patterns. The second step is to study the tail beating of these sperm and  
93 their subsequent boundary-dependent navigation in a reservoir with quiescent medium to  
94 determine the influence of the tail beating pattern on this navigational mechanism. For this second  
95 step, we use phase contrast microscopy, cell tracking, resistive force theory (41), lubrication  
96 approximation (42), and finite element method simulation. This two-step approach bypasses the  
97 challenges associated with studying the flagellar beating pattern in simple shear flow yet enables  
98 us to investigate sperm rheotaxis and boundary-dependent navigation concurrently.

## 99 **Results and Discussion**

100 To characterize the sperm flagellar beating patterns, we first isolated motile swimmers  
101 within a zone of a microfluidic chip filled with Tyrode albumin lactate pyruvate (TALP) medium  
102 using a rheotaxis-based method (40). For more details about this isolation technique, please see  
103 the Methods section. The movement of the motile sperm inside the microfluidic zone filled with  
104 quiescent medium can be seen in Movie S1, which shows that sperm with symmetric beating  
105 patterns move with progressive motion, whereas those with asymmetry in their beating patterns,  
106 i.e., one part of the flagellum consistently bends more significantly to one side, swim in circular  
107 paths. Interestingly, all these sperm have navigated upstream via rheotaxis even though they  
108 feature different beating patterns ranging from symmetric to asymmetric. In addition, the velocity  
109 of the average path (VAP) in the separated sample is higher than a threshold value ( $VAP \geq$   
110  $53.2 \mu\text{m/s}$ ). In our previous study (40), we demonstrated that this minimum threshold is tunable  
111 via the injection rate. The various flagellar beating patterns and the tunable minimum VAP in the

112 separated samples indicate that sperm rheotaxis is more sensitive to VAP and thus motility itself  
113 rather than the pattern of the flagellar beating.

114 The asymmetric flagellar beating pattern and pathway of these circular-swimming sperm  
115 were captured using phase-contrast microscopy, as shown in Fig. 1(a) and (b). Fig. 1(c)  
116 demonstrates the trajectories of nine other sperm exhibiting such circular motion, in which the  
117 centers of these circular paths move randomly over time. Initial observations also suggest the non-  
118 significant influence of the wall on the motion of the sperm with non-progressive motility  
119 compared to that of the progressive ones. In fact, due to near-wall hydrodynamic interactions,  
120 when sperm with symmetric beating patterns and thus progressive motility encounter the side wall,  
121 they begin to swim parallel along it (indicated by the blue line in Fig. 1(d)). Meanwhile, the sperm  
122 with asymmetric beating either retain their circular trajectory (indicated by the red line in Fig. 1(d))  
123 or return to the circular trajectory after partially following the wall.

124 To quantitatively describe the asymmetric beating pattern, circular motion, and  
125 hydrodynamic interactions of the sperm, we first quantified the correlation between the asymmetry  
126 in the beating and the circular motion. It has been observed that in a quiescent medium, sperm  
127 (similar to *E. coli*) swim in proximity to surfaces and in large circles so that the rotation axis is  
128 perpendicular to the surface even if the motion produced by the flagellum is progressive. Tung et  
129 al. (23) and Lauga et al. (43) attributed this circular motion to the swimmer's hydrodynamic  
130 interactions with the surface, as the head and tail of bacteria rotate counter clockwise and clockwise  
131 (or vice versa), respectively (44–46), while sperm exhibit self-rolling motion. This self-rolling  
132 motion consists of the sperm head and tail rotating in the x-z plane with  $\Omega_R$ , as indicated in Fig.  
133 1(E). This rotation in the sperm head and tail generates a subsequent angular velocity that leads to  
134 the microswimmer swimming in circles in the x-y plane. Otherwise, in the absence of the self-

135 rolling motion, a progressive sperm cell does not experience torque and swims progressively. We  
136 used phase-contrast microscopy (47) to examine whether the sperm in our experiment exhibit this  
137 self-rolling motion, in which the paddle-shaped head of the bovine sperm twinkles as it flips as  
138 demonstrated in Fig. 1(F). As can be seen in Fig. 1(b) and (c), no twinkling was observed in the  
139 sperm with intrinsic circular motion. Therefore, the hydrodynamic interactions with the top (or  
140 bottom) surface of the microfluidic chip are not responsible for the circular motion we observe,  
141 indicating the circular motion is solely due to intrinsic asymmetry in the flagellar beating pattern.

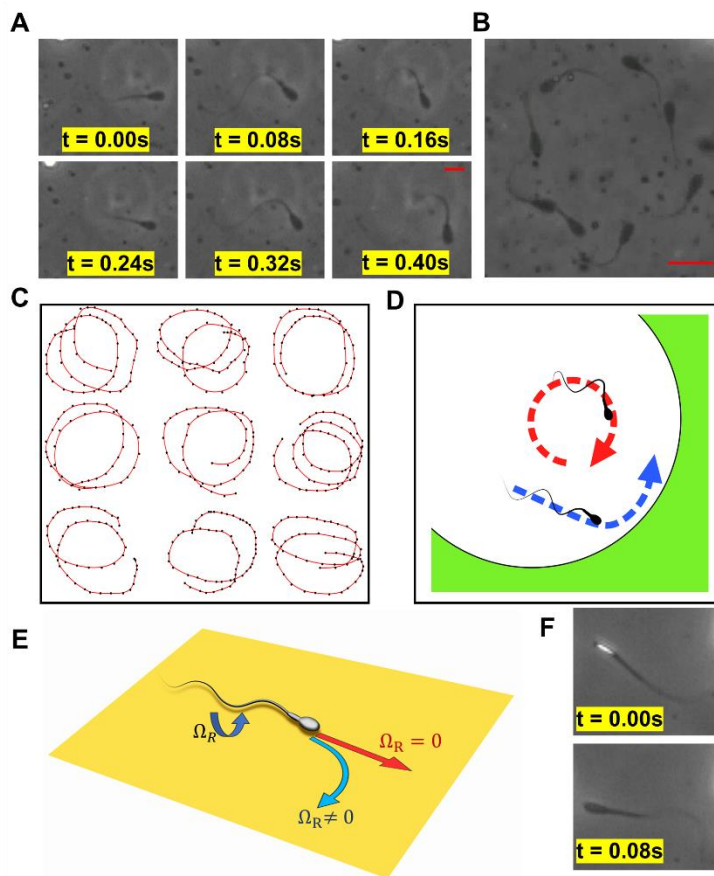

**Fig. 1. Experimental observation of sperm motion and their interactions with a curved wall.** (A) The asymmetric sperm flagellar beating pattern over time, in which the thicker part of the flagellum always bends toward the left side of the sperm. (B) Image of a single sperm exhibiting intrinsic circular motion over time, acquired with phase contrast microscopy. As no twinkling was observed, it is apparent the sperm does not flip. (C) Trajectories of nine different sperm with intrinsic circular motion, in which no deterministic movement toward any direction was observed. (D) The sperm isolated within the quiescent medium feature either progressive (blue dashed line) or intrinsic circular motion (red dashed line). (E) Self-rolling motion in the swimmer results in a torque and subsequent swimming in circles. For  $\Omega_R = 0$ , no circular motion occurs. (F) Phase contrast microscopy enables us to differentiate the sperm with and without self-rolling. Rotation in the sperm head can be identified by its twinkling. Scale bar: 10  $\mu\text{m}$

142

143



144 Asymmetry in the flagellar beating pattern of sperm is shown to be reliant on the  
145 intracellular  $\text{Ca}^{2+}$  concentration when it is exposed to a chemical stimulant (48, 49). For instance,  
146 the biological pathway of asymmetric beating for some marine invertebrates in a gradient of  
147 chemical stimulant, including *Ciona* and sea urchin, is known to involve  $\text{Ca}^{2+}$ -sensitive proteins  
148 called “calaxin” (10) and “calmodulin” (48, 50, 51), respectively. The increase in the intracellular  
149 concentration of  $\text{Ca}^{2+}$  leads to calaxin (or calmodulin) suppressing the movement of the outer  
150 dynein arm. This suppression of the outer dynein arm then leads to asymmetric beating. Although  
151 the role of calmodulin involved in the motility of stimulated sperm is known to be central for most  
152 mammals (52) (e.g., bovine sperm (49)), the biological details of asymmetric beating at different  
153 stages of sperm motility, including activated (i.e., unstimulated) and hyperactivated (i.e.,  
154 stimulated) is still unknown. Therefore, further molecular insight into asymmetric beating in  
155 mammalian sperm is required to propose a mathematical model at the single cell level that captures  
156 the molecular details of the process. Nevertheless, several studies have been carried out to propose  
157 potential mechanisms for in-plane sperm circular motion caused by asymmetric flagellar beating  
158 for both unstimulated and stimulated sperm. A well-established method to connect the asymmetry  
159 in the beating pattern of unstimulated sperm to its circular movement is to measure the intrinsic  
160 flagellar curvature (41), so that a non-zero curvature in one beat yields a circular motion. This non-  
161 zero curvature can be due to the compression of the sperm flagellum by the internal forces in a  
162 viscous fluid, which results in a buckling behavior so that symmetry in the beating breaks and thus  
163 the sperm swims in circular trajectories, as proposed by Gadelha et al. (53). Recently, Saggiorato  
164 et al. (39) studied the motion of a progesterone-stimulated tethered human sperm and proposed  
165 that a phase difference between the first and second harmonic yields a non-zero torque and thus  
166 can lead to a circular motion of stimulated sperm. Although this study brings new insights about

167 the role of temporal harmonics in the beating pattern and its relation to the circular motion of  
168 stimulated tethered human sperm, it is not necessarily valid for the untethered, unstimulated bovine  
169 sperm in our study. Therefore, other potential mechanisms at the single cell level by which  
170 asymmetric flagellar beating of untethered and unstimulated bovine sperm leads to circular  
171 movement are required.

172 To determine the relation between asymmetric beating and circular motion of sperm, we  
173 first reconstructed the beating patterns of the flagellum over one beat. We then applied the Fourier  
174 transform to the beating pattern to yield its temporal frequencies (Supplementary Information Part  
175 I). Our results indicate that asymmetry in the beating pattern is associated with an increase of the  
176 main frequency (i.e., first harmonic) as well as decrease in its amplitude. Moreover, the zeroth and  
177 higher harmonics simultaneously appear in the frequency domain as the asymmetry occurs. We  
178 then described the beating pattern in the Fourier series ansatz, which includes an offset term as  
179 well as the first and higher harmonics, as described in Eq. 1,

$$180 \quad y(x, t) = \sum_{n=0} a_n \cos(n\omega t - kx) \quad (1)$$

181 in which  $k = \frac{2\pi}{\lambda}$  (with  $\lambda \approx L$ ) is the wave number,  $\omega$  is the main frequency, and  $a_n$  is the amplitude  
182 of the  $n^{\text{th}}$  harmonic, including a non-thermal white Gaussian noise (54). That is, the amplitude can  
183 be described by  $a_n = \tilde{a}_n(1 + \eta_n(t))$  with  $\langle \eta_n(t) \rangle = 0$  and  $\langle \eta_n(t) \cdot \eta_{n'}(t') \rangle = D_n \delta_{nn'} \delta(t - t')$ .  
184 This non-thermal noise may stem from asynchrony in the collective dynamic (55–57) of the dynein  
185 motor proteins that are responsible for transport along microtubules within the sperm flagella (3,  
186 10).

187 Applying resistive force theory on the wave function described by Eq. 1, we can calculate  
 188 the forces produced by each segment of the flagellum in the tangential (x) and normal (y) directions  
 189 using  $f_x = -(\xi_N - \xi_T)\left(\frac{\partial y}{\partial t}\right)\left(\frac{\partial y}{\partial x}\right)$  and  $f_y = -\xi_N\left(\frac{\partial y}{\partial t}\right) + (\xi_N - \xi_T)\left(\frac{\partial y}{\partial t}\right)\left(\frac{\partial y}{\partial x}\right)^2$ , in which  $\xi_N$  and  $\xi_T$   
 190 are drag coefficients in the normal and tangential directions. Therefore, the time-averaged forces  
 191 produced by each segment of the flagellum in the tangential ( $\tilde{f}_x$ ) and normal ( $\tilde{f}_y$ ) directions can be  
 192 described by:

$$193 \quad \tilde{f}_x = -\frac{1}{2}(\xi_N - \xi_T)\omega k \sum_{n=0} n \tilde{a}_n^2 \quad (2)$$

$$194 \quad \tilde{f}_y = (\xi_N - \xi_T)\omega k^2 a_0 \sin(kx) \sum_{n=0} n \tilde{a}_n^2 \quad (3).$$

195 Integrating  $\tilde{f}_x$  and  $\tilde{f}_y$  over the flagellum, the total forces produced in the tangential and normal  
 196 directions are  $L\tilde{f}_x$  and zero, respectively. Although the emergence of the zeroth harmonic does not  
 197 lead to a net normal force and subsequent translational motion, it produces a torque

$$198 \quad \tau_f = (\xi_N - \xi_T)\omega k L a_0 \sum_{n=0} n \tilde{a}_n^2 \quad (4).$$

199 The obtained relations for the produced force and torque by the flagellum reveal that while the  
 200 tangential force is correlated to the characteristics of the first and higher harmonics, the amplitude  
 201 of the zeroth harmonic is involved in the torque as well. Applying the zero net torque and force  
 202 constraint, the tangential and angular velocity are found to be correlated through  $a_0$ :

$$203 \quad \tilde{\Omega} = \frac{\xi_T}{\xi_N} \left( \frac{24a_0}{L^2} \tilde{V}_p \right) \quad (5)$$

204 in which  $\tilde{\Omega}$  is the average angular velocity (Supplementary Information Part II).

205 To validate the analysis, we experimentally measured the angle sperm sweeps out in one  
206 beat ( $\Delta\theta$ ), in which  $\Delta\theta$  is the difference between the deviation of the sperm head direction from  
207 the average path to its left ( $\theta_1$ ) and right ( $\theta_2$ ) sides (Fig. 2A). Fig. 2B displays the measured  $\Delta\theta$   
208 values for sperm with progressive motility and circular motion. As can be seen, the average of  
209  $\Delta\theta(t)$  (i.e.,  $\widetilde{\Delta\theta}$ ) for sperm with circular movement are significantly higher than that of sperm with  
210 progressive motility. Considering that  $\widetilde{\Omega} = \frac{\omega}{2\pi} \cdot \widetilde{\Delta\theta}$ , we measured the normalized angular velocity  
211 ( $L\widetilde{\Omega}V_p^{-1}$ ) and curvature of the sperm path ( $\widetilde{\kappa}L$ ) with regards to the amplitude of the zeroth  
212 harmonic, as shown in Fig. 2C. Based on Fig. 2C, we determined  $\frac{\xi_N}{\xi_T}$  to be  $1.93 \pm 0.33$ , which is  
213 comparable to previously reported values (58). Based on these experimental results and the  
214 agreement they show to the relations we derived from resistive force theory, we conclude that the  
215 circular motion in the sperm motility is attributed to the zeroth harmonic in the flagellar beating.

216

217

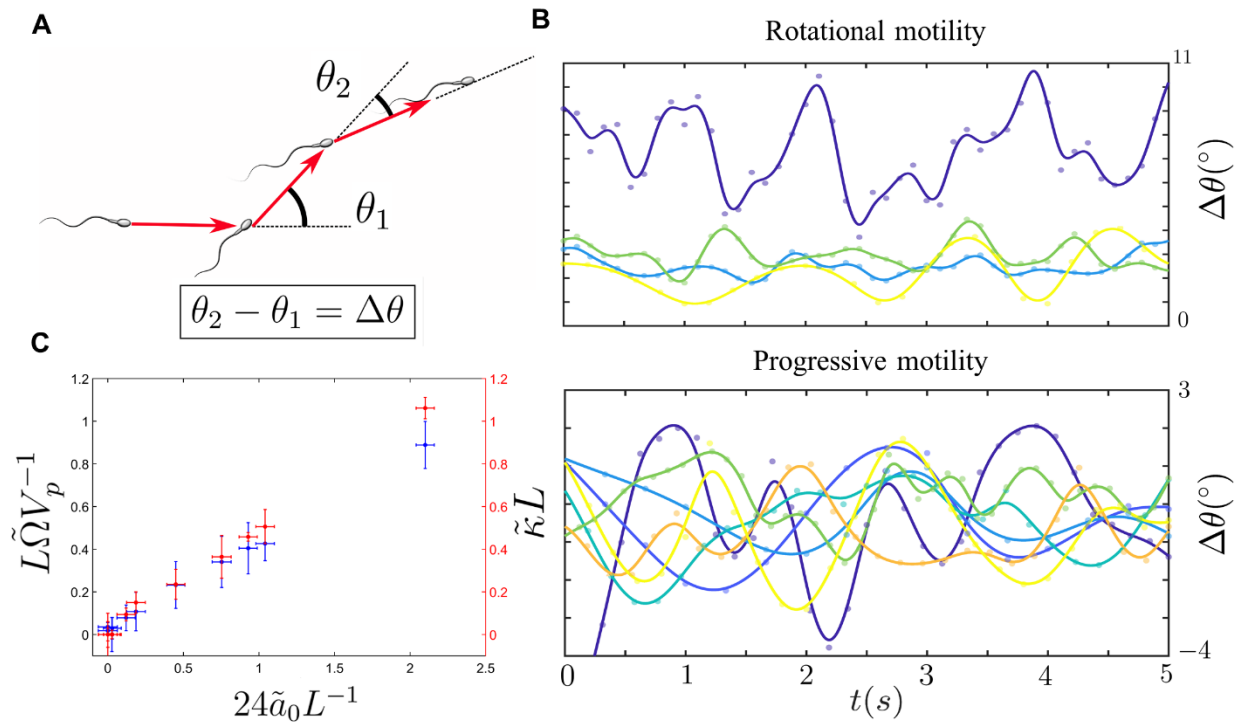

**Fig. 2. Intrinsic circular motion caused by the presence of the zeroth harmonic.** (A) Schematic of sperm motion featuring intrinsic circular motion.  $\theta_1$  and  $\theta_2$  are the deviation in the sperm direction towards the left and right of the mean path. (B)  $\Delta\theta$  measured for sperm with circular motion (top) and progressive motility (bottom). The average value of  $\Delta\theta$  is significantly higher in sperm with circular motion. (C) The normalized angular velocity ( $L\tilde{\Omega}V_p^{-1}$ , blue) and curvature of the sperm path ( $\tilde{\kappa}L$ , red) plotted versus the amplitude of the zeroth harmonic ( $\tilde{a}_0$ ) to experimentally confirm the results obtained from resistive force theory.  $\frac{\xi_N}{\xi_T}$  was determined to be  $1.80 \pm 0.34$  and  $2.07 \pm 0.31$  for the blue and red data points, respectively.

The average of these values reported as  $\frac{\xi_N}{\xi_T}$  in the main text.

218

219 We also demonstrate the effect of non-thermal Gaussian noise (33) in the amplitude of the  
 220 zeroth harmonic on the sperm trajectory. Based on the results gained from the resistive force theory  
 221 analysis, the noise in the zeroth harmonic yields a similar noise in the angular velocity. Therefore,  
 222 the angular velocity can be described as  $\Omega = \tilde{\Omega}(1 + \eta_0(t))$ . Including the non-thermal white

223 Gaussian noise in the angular velocity and simulating the sperm motion at different signal-to-noise  
224 ratios (SNR), we found that this noise leads to stochastic movement of the center of the sperm's  
225 circular path, as can be seen in Fig. 3A, which is consistent with our experimental observation of  
226 bull sperm movement shown in Fig. 1C. These findings suggest that the inconsistency in the  
227 sperm's circular path is a consequence of the noise in the amplitude of the zeroth harmonic. In  
228 addition, we found the sperm are more capable of maintaining their circular path at higher SNR  
229 values (SNR = 50, 55, 60), and thus we observe less movement at the center of these paths, as can  
230 be seen in Fig. 3A. At lower SNR values, the sperm motion contains more stochasticity and thus  
231 covers a larger domain. We repeated the simulation for 1000 sperm cells to find the diffusivity of  
232 the circular path's center (i.e.,  $D_c$ ) at different SNR values, and as can be seen in Fig. 3B,  $D_c$  is  
233 inversely correlated to the SNR. Accordingly, we expect the distance of the circular path's center  
234 from its initial location,  $r_c(t)$  to increase over time with  $(D_c t)^{0.5}$ . Fig. 3C shows the  $r_c(t)$  obtained  
235 at different SNR values, which confirms the localization of the sperm at high SNR and the increase  
236 of  $r_c(t)$  in time with  $t^{0.5}$ .

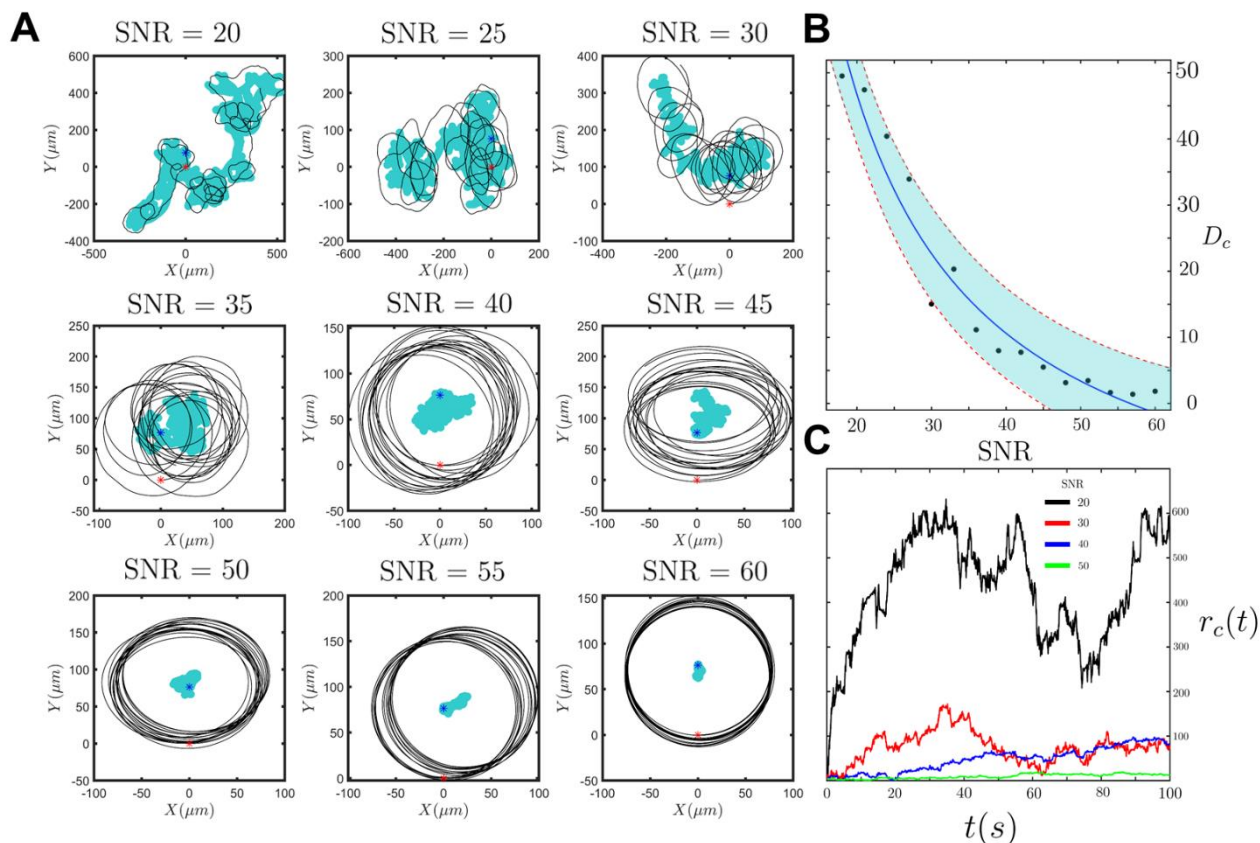

**Fig. 3. Noise in the angular velocity and the corresponding diffusivity of the circular path's center.** (A) The sperm trajectory at 9 different signal-to-noise ratios ( $20 \leq SNR \leq 60$ ). Higher SNR values yield more consistent and deterministic circular motion. (B) The diffusivity of the circular path's center vs. SNR. Each point in the figure was obtained by simulating the motion of 1000 sperm cells with similar initial conditions. (C) The distance of the circular path's center from its initial location with respect to time. The obtained results are at 9 different SNR; 4 of which are demonstrated in this figure.

237

238

239

240

241

242 Berke et al. (27) modeled the far-field approximation of the flow generated by a  
243 microswimmer with progressive motion as a pusher force dipole. Therefore, we used the sperm  
244 dipole model, including the components of the circular motion, to calculate the sperm contribution  
245 to the fluid flow and thus the hydrodynamic interactions inside the quiescent zone at distances  
246 adequately away from the curved sidewall ( $> 2 \times$  sperm length). The proposed model is depicted  
247 in Fig. 4A, in which  $f$  is the tangential force produced by the sperm flagellum,  $f''$  is the  
248 perpendicular force corresponding to the torque caused by asymmetric beating, and  $f'$  is the drag  
249 force required for the torque-free condition (26). The magnitude of  $f'$  and  $f''$  are equivalent to  
250 each other while the  $\frac{f''}{f}$  ratio (i.e.,  $\gamma$ ) is equal to  $\frac{2\tilde{\alpha}_0}{L}$  (see Eq. S38). The contribution of the sperm's  
251 active swimming to the fluid flow is the solution of the Stokes equation for the proposed model  
252 shown in Fig. 4A. The general form of the Stokes equation for such a swimmer is

253 
$$\nabla p - \mu \nabla^2 v = \sum f_i \delta(r - r_i) \quad (6)$$

254 in which  $p$  is the pressure,  $\mu$  is the dynamic viscosity of the TALP medium (0.94 mPa/s),  $v$  is the  
255 fluid velocity,  $r$  is the position,  $r_i$  is the position of the point force  $f_i$ , and  $\delta$  is the Dirac delta  
256 function. To solve the Stokes equation, we can either use Green's function, known as the  
257 "Stokeslet" description (42, 59), or solve the equation numerically. The analytical expression for  
258 the swimmer model using the Stokeslet description and mirror image (46, 60) method is explained  
259 in Part IV of the Supplementary Information.

260 The near- and far-field flow produced by sperm has been studied previously (61). However,  
261 for the sake of simplicity and precision, we carried out finite element method simulations in a  
262 cylindrical domain similar to the quiescent zone to numerically solve the Stokes equation along  
263 with mass conservation (62). Considering the sperm swim in a quasi-2D plane that is located  $\sim 5$



264  $\mu\text{m}$  below the top surface and parallel to it (63), we obtained the velocity field imposed by the  
265 flagellar beating for  $\widetilde{\Delta\theta} = 0^\circ - 15^\circ$  (Fig. 4B). We then integrated the net flow in the y direction  
266 (Fig. 4B) imposed on the sperm body, which is caused by the presence of the no-slip walls, to  
267 calculate the hydrodynamic interaction (i.e., HI), the results of which are demonstrated in Fig. 4C.  
268 The velocity field generated by the progressive flagellar beating ( $\widetilde{\Delta\theta} = 0$ ) in the presence of the  
269 no-slip boundaries leads to the attractive hydrodynamic interactions ( $> 0$ ), as indicated in Fig. 4C,  
270 which agrees with previous studies (22). As we added and increased the components of the circular  
271 motion, the attractive hydrodynamic interactions decayed for a constant progressive velocity of  
272 the sperm ( $20 \mu\text{m/s} < V_p < 80 \mu\text{m/s}$ ), indicating that the motion of the microswimmer is less  
273 influenced by nearby boundaries as components of circular motion emerge in the motion. To gain  
274 a better understanding about the mechanism of this reduction in hydrodynamic attraction, we  
275 simulated the flow field produced by components of the progressive ( $\vec{f}$ ) and the circular motion  
276 ( $\vec{f}''$  and  $-\vec{f}''$ ) and their corresponding drags ( $-\vec{f}, \vec{f}'$  and  $-\vec{f}'$ ) separately (Fig. S4). The flow field  
277 produced by the progressive component and its corresponding drag is outward in the front and rear  
278 of the swimmer, while inward on the sperm's right and left sides. In contrast, the flow field  
279 produced by the components of the circular motion and their corresponding drags are inward in  
280 the front and rear of the swimmer, while outward on the sperm's right and left sides. Accordingly,  
281 as the components of the circular motion becomes larger, more of the flow imposed by the  
282 progressive motion is damped by that of the circular motion and therefore the hydrodynamic  
283 attraction decreases with sperm circular motion.

284 This decay in the far-field hydrodynamic interaction is also predicted by the analytical  
285 expression for the swimmer model using the Stokeslet description. In fact, the attraction of the

286 sperm toward the wall in the presence of the components of the circular motion can be described  
287 by:

$$288 \quad u_y = u_y^p(-2 + 3\cos(2\widetilde{\Delta\theta}) - \gamma\sin(2\widetilde{\Delta\theta})) \quad (7),$$

289 in which  $u_y$  and  $u_y^p$  describe the far-field attraction with and without the components of the circular  
290 motion. Neglecting  $\gamma$ , an increase in  $\widetilde{\Delta\theta}$  results in a decrease of attraction to the walls.  
291 Interestingly, at  $\widetilde{\Delta\theta}_n = \frac{1}{2}\cos^{-1}\frac{2}{3} \approx 24.1^\circ$  and corresponding curvature of  $\tilde{\kappa}_n = \frac{\omega}{4\pi\tilde{v}_p}\cos^{-1}\frac{2}{3}$ , the  
292 swimmer experiences no attraction toward the walls and becomes neutral.

293

294

295

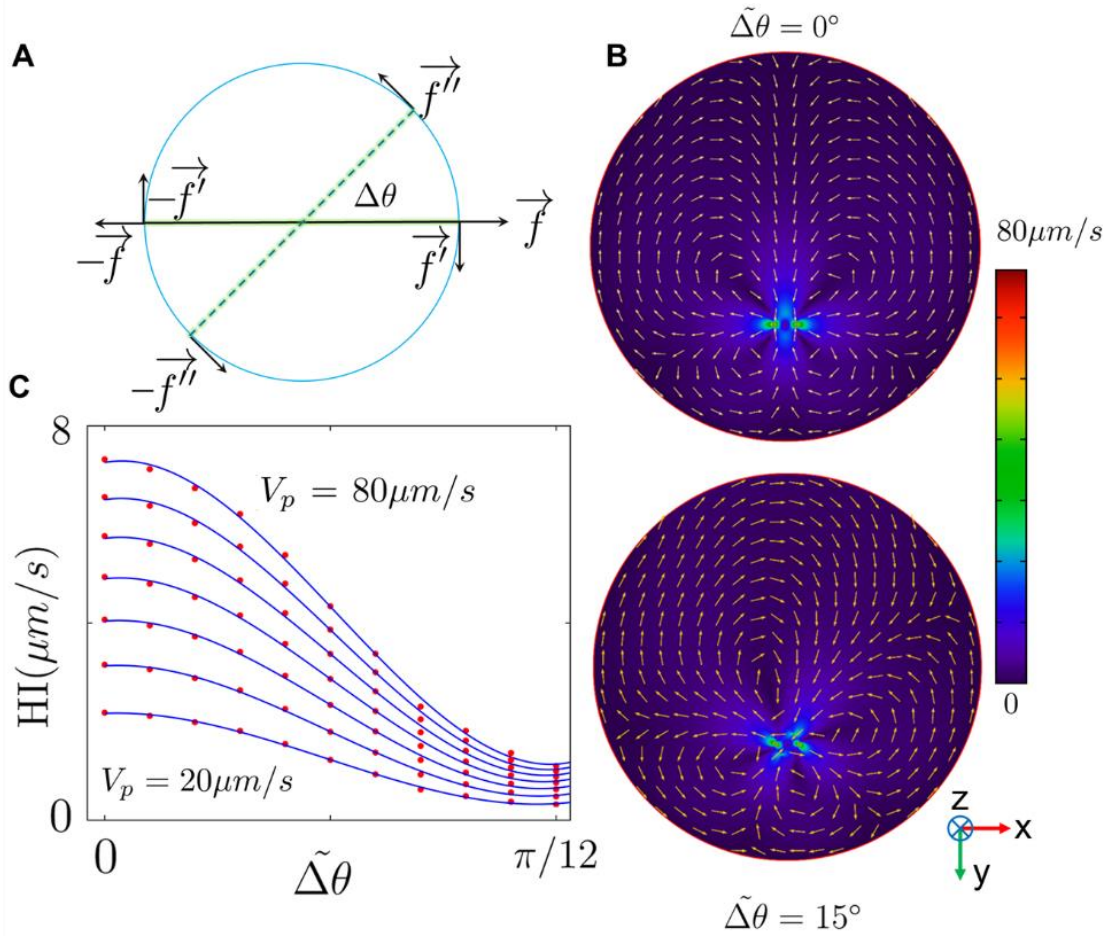

**Fig. 4. Dipole swimmer model and far-field hydrodynamic interactions.** (A) The dipole swimmer model, including the components of the circular motion ( $f'$  and  $f''$ ). (B) The velocity field obtained from solving the Stokes equation for the dipole swimmer model in a quiescent medium. The colors represent the magnitude and the arrows are normalized to visualize the direction of the vector field. (C) The attraction caused by the presence of the wall decays as we increase  $\Delta\theta$ .

296

297

298

299

300

301 At the near-wall condition ( $<$  the sperm body length), the dipole approximation is no longer  
302 valid (35) and the sperm-wall interaction can be understood by near-field approximations, as  
303 previous theoretical (38, 64) and simulation-based (65) studies suggest. We categorize the sperm  
304 interaction with the curved sidewall into four different types: 1) a progressive sperm encounters  
305 the wall, rotates, and follows it, as can be seen in Fig. 5A(I); 2) a non-progressive sperm encounters  
306 the wall, follows it temporarily, and detaches (Fig. 5A(II)); 3) a non-progressive sperm that does  
307 not contact the wall (Fig. 5A(III)); and 4) a non-progressive sperm that encounters the wall and  
308 stays still or moves slowly along it (Fig. 5A(IV)). These categories can be seen in Movie S2. To  
309 interpret these near-wall interactions, we first used surface contact force analysis, in which the  
310 wall influence on the sperm movement is modeled as a normal force.

311 When sperm is in contact with the wall surface there is a positive surface contact force,  
312 whereas a surface force of zero corresponds to detachment of the swimmer from the wall (66).  
313 Consider a sperm that encounters the wall of the quiescent zone with an incident angle of  $\beta$ , as  
314 depicted in Fig. 5B. Under a zero-net force constraint, the normal surface force becomes  $N =$   
315  $F_T \sin(\beta) - F_N \cos(\beta)$ , where  $F_T$  and  $F_N$  are the tangential and perpendicular forces, respectively.  
316 The threshold angle that corresponds to the  $N = 0$  situation (i.e.,  $\beta_{th}$ ) is equal to  $\tan^{-1} \gamma$ . For  $\beta <$   
317  $\beta_{th}$ , the normal surface force becomes negative and no contact occurs accordingly. Hence, the  
318 sperm does not follow the wall. Since an increase in  $\gamma$  leads to higher  $\beta_{th}$ , sperm with greater  $\gamma$   
319 values are less likely to contact and follow the wall.

320 For incident angles greater than  $\beta_{th}$  (where the sperm-wall contact occurs), an increase in  
321  $F_N$  leads to a smaller  $N$ , and thus easier detachment from the wall results. For the other condition,  
322 in which the direction of the perpendicular force is opposite (Fig. 5C), the surface force becomes  
323 greater ( $N = F_T \sin(\beta) + F_N \cos(\beta)$ ) and detachment is more difficult. However, since the final

324 orientation of the swimmer at the contact point is tilted, the component of the perpendicular force  
 325 along the wall overcomes the tangential force, and subsequently the sperm movement along the  
 326 wall becomes slower. At the extreme condition, the sperm cell stands still.

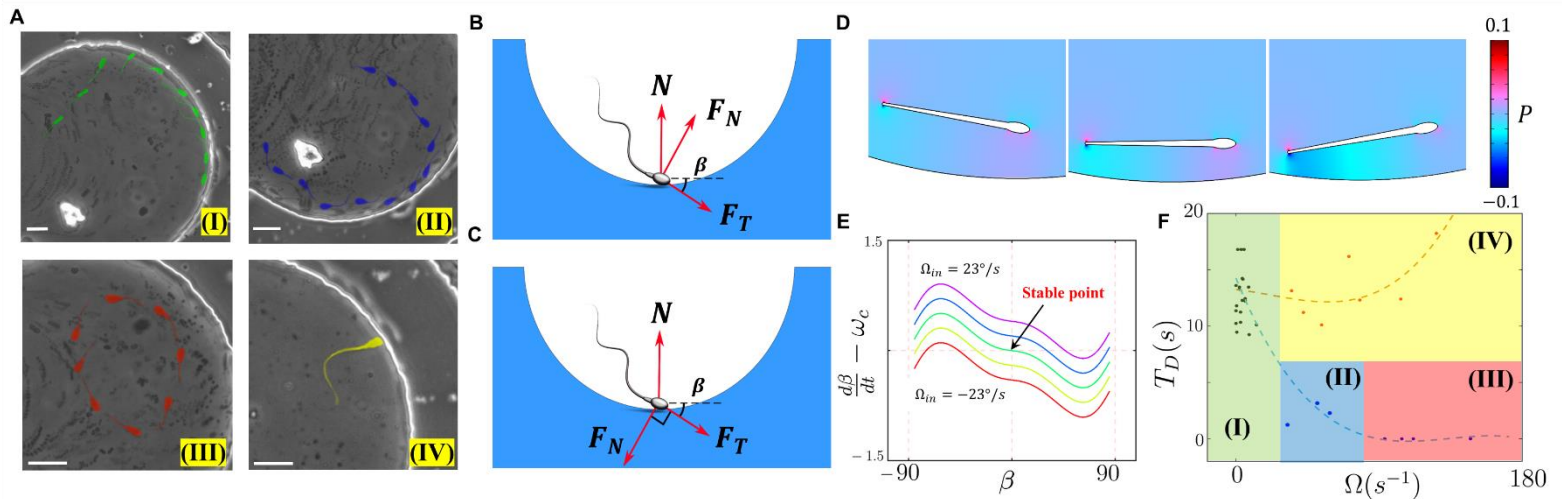

327 **Fig. 5. Near-field interactions and the susceptibility of the sperm to follow the wall.** (A) Sperm with (I) progressive motility that is susceptible to the wall, (II) low intrinsic circular motion and partial susceptibility to the wall, and (III) high intrinsic circular motion and zero susceptibility to the wall. A non-progressive sperm that encounters the wall and stays still is also depicted in (IV). Scale bar:  $10\mu m$  (B) The forces produced by the sperm flagellum and the normal surface contact force ( $N$ ). This arrangement describes Fig. A(I) and (II) and (III). (C) The forces produced by the sperm flagellum and the normal contact force. This arrangement describes Fig. A(IV). (D) The pressure distribution caused by sliding of sperm nearby the wall at  $\beta = -20^\circ, 0^\circ$ , and  $20^\circ$ , from left to right. This pressure distribution is used to calculate the torque and angular velocity imposed on the sperm by the presence of the wall. (E) Dynamic of the sperm incidence angle in the phase-plane, depicted at different intrinsic angular velocity values ( $-23^\circ/s \leq \Omega_{in} \leq 23^\circ/s$ ). (F) The sperm detention time on the curved wall measured for sperm with different intrinsic angular velocities. Sperm with  $|\Omega_{in}| > 76^\circ/s$  (red box) do not contact the wall, while the ones with  $8^\circ \leq |\Omega_{in}| \leq 76^\circ$  (blue box) are partially susceptible to the wall and follow it temporarily. Sperm with  $|\Omega_{in}| \leq 8^\circ$  (green box) are capable of following the wall without detaching. The detention time for sperm cells corresponding to (IV) in Fig. 5(A) and Fig. 5(C) are presented in the yellow box.

328

329

330 Although surface contact force analysis can be used to gain a general notion of near-field  
331 interactions, its only valid under circumstances where contact occurs. Therefore, we also  
332 developed a hydrodynamic explanation for near-field interactions to obtain more quantitative  
333 characterization. We used lubrication theory as a platform, where the sperm distance from the wall  
334 was assumed to be much smaller than its length (42). We then solved the Stokes equation and  
335 extracted the pressure distribution for sperm (Fig. 5D) at different incident angles ( $-90^\circ < \beta <$   
336  $90^\circ$ ) and constant progressive velocity ( $V_p = 80 \mu\text{m/s}$ ). Given that the contribution of pressure in  
337 the stress tensor dominates that of the viscous stress (42) ( $pI \gg \mu(\nabla v + \nabla v^T)$ ), the torque exerted  
338 by the wall was calculated and the corresponding angular velocity is

$$339 \quad \frac{d\beta}{dt} = \frac{1}{\xi_N} \frac{\int \sigma(x - x_{cm}) dx}{\int (x - x_{cm})^2 dx} \quad (8),$$

340 in which  $\sigma$  is the stress tensor and  $x_{cm}$  is the coordinate of the sperm's center of mass. The obtained  
341 angular velocity as a function of  $\beta$ , including the effect of  $\Omega_{in}$ , is shown in Fig. 5E. As can be seen  
342 in Fig. 5E, for  $\Omega_{in} = 0$ , the stable point occurs at  $\beta = 0$  with  $\frac{d\beta}{dt} = \omega_c$ , which is the required  
343 angular velocity to follow the boundary of the curved wall (Supplementary Information part IV).  
344 Whereas for  $\Omega_{in} > 0$ , which corresponds to the configuration of Fig. 5B,  $\frac{d\beta}{dt} > \omega_c$  at  $\beta = 0$ ,  
345 meaning it is not stable when following the boundary and the sperm subsequently detaches from  
346 the wall. For  $\Omega_{in} < 0$  (Fig. 5C),  $\frac{d\beta}{dt} - \omega_c = 0$  at  $\beta < 0$ , which results in the tilted orientation of  
347 the sperm at its contact point, and thus harder detachment and slower boundary-following motion.

348 To confirm our results obtained from the surface force analysis and lubrication  
349 approximation, we experimentally measured the time of sperm detention on the wall (i.e.,  $T_D$ ) for  
350 different  $\Omega_{in}$  (Fig. 5F). The experimental results for  $T_D$  indicate that the sperm exhibiting intrinsic

351 circular motion either do not contact the wall ( $|\Omega_{in}| > 76^\circ/s$ ) or swim on the wall for shorter  
352 times ( $8^\circ/s < |\Omega_{in}| < 76^\circ/s$ ) compared to progressive sperm, which is consistent with the  
353 findings of the surface force analysis. The detention time for sperm cells corresponding to (IV) in  
354 Fig. 5(A) and Fig. 5(C) are presented in the yellow box in Fig. 5(F), which confirms that the  
355 components of the circular motion in sperm can lead to higher detention times and harder  
356 detachments, as we anticipated. Based on these experimental data, and similar to the far-field case,  
357 sperm with progressive motility are the most susceptible to near-field boundary-dependent  
358 navigation.

359 By isolating sperm cells based on their rheotactic behavior using a microfluidic system, we  
360 demonstrated that sperm cells are able to navigate via upstream swimming while they feature a  
361 continuum of asymmetry in their flagellar beating patterns. To identify the role of asymmetric  
362 beating on the boundary-dependent navigation, and then compare it to rheotaxis, we then  
363 investigated sperm motion after isolation in a quiescent zone with curved walls. Our results  
364 indicate that asymmetric flagellar beating patterns cause sperm to swim in circles. This circular  
365 motion of the sperm the far-field hydrodynamic interactions so that sperm with intrinsic circular  
366 motion are less attracted to walls. Likewise, at distances closer to the wall, the sperm with non-  
367 progressive motility are less likely to navigate along the wall in comparison to completely  
368 progressive sperm.

369 Based on these results, we conclude that boundary-dependent navigation is more sensitive  
370 to the beating pattern compared to sperm rheotaxis; whereas sperm rheotaxis is more sensitive to  
371 the motility (VAP). Accordingly, the findings of this paper, accompanied with the clinical  
372 correlation between fertility and progressive motility in sperm samples (67), suggests that at some  
373 points during the fertilization process, boundary-dependent navigation plays a central role. The



374 findings of this study provide a comprehensive understanding of sperm locomotion during the  
375 fertilization process before reaching the fertilization site and thus can be used to improve the  
376 conventional tools for infertility diagnosis and treatment (68).

## 377 **Materials and Methods**

378 **Semen sample preparation.** Commercially available cryopreserved bovine semen samples were  
379 kindly provided by Genex Cooperative (Ithaca, NY) in milk and egg yolk-based extender in plastic  
380 straws. The semen in the straws were thawed in a 37 °C water bath and then diluted 1:3 with TALP  
381 (the sperm culture medium). After dilution, the viscosity of the samples was  $\sim 2.1 \text{ mPa s}^{-1}$ . The  
382 initial sperm concentration in the semen samples were  $\sim 100$  million/mL and after diluting with  
383 TALP, reduced to a quarter of the initial concentration. The motility of the semen sample after  
384 dilution ranged from 20–30%. We used 10 different semen samples in both milk and egg yolk-  
385 based extender. The TALP recipe was as follows: NaCl (110 mM), KCl (2.68 mM),  $\text{NaH}_2\text{PO}_4$   
386 (0.36 mM),  $\text{NaHCO}_3$  (25 mM),  $\text{MgCl}_2$  (0.49 mM),  $\text{CaCl}_2$  (2.4 mM), Hepes buffer (25 mM), glucose  
387 (5.56 mM), pyruvic acid (1.0 mM), penicillin G (0.006% or 3 mg/500 ml), and bovine serum  
388 albumin (20 mg/ml).

389 **Micro fabrication process and semen injection.** The microfluidic device was made of  
390 polydimethylsiloxane using a standard soft lithography protocol (69, 70). The diameter of the  
391 curved quiescent zone was 200  $\mu\text{m}$  and the height of the chamber was 25  $\mu\text{m}$ . The diluted semen  
392 was injected into the microfluidic device using gravitation and the flow generated in the channel  
393 was controlled by changing the height of the semen container. Since sperm rheotaxis emerges  
394 under very low shear rate ( $0.6 \text{ s}^{-1}$ ), using gravitation instead of conventional syringe pumps is a  
395 more efficient way to obtain and control low flow rates.



396 **Rheotaxis-based sperm isolation and phase-contrast microscopy.** To isolate motile bovine  
397 sperm inside the quiescent zone, we utilized a microfluidic corral system(40) that isolates motile  
398 swimmers based on their ability to move upstream. As we injected the sample with an injection  
399 rate of 1.2 mL/h, sperm with motilities higher than 53.2  $\mu\text{m/s}$  can swim upstream and enter the  
400 quiescent zone (which is filled with TALP), allowing us to study the sperm movement with  
401 minimal fluid mechanical noise. The movement of the sperm cells were acquired with a phase-  
402 contrast microscope, where flipping of the sperm head leads to subsequent phase shifts in the light  
403 passing through, leading to variation in the observed brightness (i.e., a twinkling effect).

404 **Cell tracking and zeroth harmonic measurement.** The sperm trajectories and other motility  
405 related characteristics were analyzed with ImageJ and a custom MATLAB code. To measure the  
406 amplitude of the zeroth harmonic, we measured the maximum amplitude of the beating towards  
407 the left ( $y_L$ ) and right ( $y_R$ ) sides of the swimmer, so that the magnitude of the zeroth harmonic is:

408 
$$a_0 = \frac{|y_L - y_R|}{2} \quad (9).$$

409 The error bars in Fig. 2(C) result from measuring  $a_0$  at 10 different beats, while the error bars of  
410  $\tilde{\Omega}$  and  $\tilde{\kappa}$  in the same figure were obtained from 10 circles of movement.

## 411 **Numerical simulation**

412 **Beating pattern reconstruction.** To reconstruct the beating pattern of the sperm, we posited the  
413 temporal part of the flagellar beating could be described by two Sine and Cosine function defined  
414 on the interval of  $[\pi - \phi_0, \phi_0]$  so that  $\phi_0 \in [\pi, 2\pi]$ . Later, by evenly extending the function (71),  
415 we obtained the beating patterns so that  $\phi_0$  determines the asymmetry in the beating; e.g.  $\phi_0 = 2\pi$   
416 corresponds to completely symmetric beating and thus progressive motility, while  $\phi_0 < 2\pi$  results

417 in asymmetry. We then applied a fast Fourier transform on the beating patterns to determine their  
418 temporal frequencies. These steps were performed using MATLAB (version R2017a).

419 **Finite element method simulations.** To obtain the velocity field imposed by the dipole swimmer  
420 model and determine the far-field hydrodynamic interactions, we first imported the structure of  
421 the quiescent zone in the COMSOL MULTIPHYSICS (version 5.2) platform. Two orthogonal  
422 Gaussian pulse functions (defined in the  $x$  and  $y$  directions) were used to define each point force  
423 in the dipole swimmer model. The mathematical form of the pulse is a 2D Gaussian distribution

$$424 \quad f\delta(x - x_0)\delta(y - y_0) = \frac{f}{2\pi\sigma_x\sigma_y} e^{-\frac{(x-x_0)^2}{2\sigma_x^2}} e^{-\frac{(y-y_0)^2}{2\sigma_y^2}} \quad (9).$$

425 We use  $x_0, y_0$  to move and  $\sigma_x, \sigma_y$  to focus the point forces arbitrarily. This strategy was chosen to  
426 lower the computational costs and prevent issues related to using small volumetric forces and their  
427 associated meshing problems in the finite element method. Finally, solving the Stokes and mass  
428 conservation equations for different  $\Delta\theta$  values, we obtained the results demonstrated in Fig. 4B.  
429 Then by integrating the velocity field imposed by the sperm, we obtained the hydrodynamic  
430 interactions in the  $y$  direction, as shown in Fig. 4C.

431 To find the torque imposed on the sperm at near-field through the lubrication  
432 approximation, we first solved the Stokes equation for the schematic shown in Fig. 5D at different  
433 incident angles. Exporting the pressure distribution and assuming the sperm's center of mass was  
434 located on the flagellum and twice closer to the head than to the tail, the torque imposed by the  
435 wall on the sperm and the subsequent angular velocity were calculated.

436 **Acknowledgement:** The authors would like to thank S. H. Cheong for providing the bull semen  
437 samples and phase-contrast microscope, as well as D. L. Koch, C. K. Tung, J. Fan, and M.

438 Esmaily for helpful discussions about hydrodynamic interactions, the dipole swimmer model, and  
439 the surface force analysis used here. This work was performed in part at the Cornell Nano Scale  
440 Facility, an NNCI member supported by NSF Grant NNCI-1542081. **Author contributions:** M.Z.  
441 and A.A. designed the research. M.Z. performed the experiments and analyzed the data. M.Z and  
442 F.J. conceived the theoretical parts. M.Z. and A.M. performed the FEM simulations. M.Z. and  
443 A.A. wrote the paper.

444

## 445 **References**

- 446 1. Yanagimachi R (1994) Mammalian fertilization. *Physiol Reprod*.
- 447 2. Suarez SS, Pacey AA (2006) Sperm transport in the female reproductive tract. *Hum*  
448 *Reprod Update* 12(1):23–37.
- 449 3. Shiba K, Baba SA, Inoue T, Yoshida M (2008) Ca<sup>2+</sup> bursts occur around a local minimal  
450 concentration of attractant and trigger sperm chemotactic response. *Proc Natl Acad Sci*  
451 105(49):19312–19317.
- 452 4. Jikeli JF, et al. (2015) Sperm navigation along helical paths in 3D chemoattractant  
453 landscapes. *Nat Commun* 6:7985.
- 454 5. Friedrich BM, Jülicher F (2007) Chemotaxis of sperm cells. *Proc Natl Acad Sci*  
455 104(33):13256–13261.
- 456 6. Bahat A, et al. (2003) Thermotaxis of mammalian sperm cells: a potential navigation  
457 mechanism in the female genital tract. *Nat Med* 9(2):149.
- 458 7. Tung C, et al. (2015) Microgrooves and fluid flows provide preferential passageways for

- 459 sperm over pathogen *Tritrichomonas foetus*. *Proc Natl Acad Sci* 112(17):5431–5436.
- 460 8. Kantsler V, Dunkel J, Blayney M, Goldstein RE (2014) Rheotaxis facilitates upstream  
461 navigation of mammalian sperm cells. *Elife* 3.
- 462 9. Miki K, Clapham DE (2013) Rheotaxis guides mammalian sperm. *Curr Biol* 23(6):443–  
463 452.
- 464 10. Mizuno K, et al. (2012) Calaxin drives sperm chemotaxis by Ca<sup>2+</sup>-mediated direct  
465 modulation of a dynein motor. *Proc Natl Acad Sci* 109(50):20497–20502.
- 466 11. Kaupp UB, et al. (2003) The signal flow and motor response controlling chemotaxis of sea  
467 urchin sperm. *Nat Cell Biol* 5(2):109.
- 468 12. Gray J, Hancock GJ (1955) The propulsion of sea-urchin spermatozoa. *J Exp Biol*  
469 32(4):802–814.
- 470 13. Alvarez L, et al. (2012) The rate of change in Ca<sup>2+</sup> concentration controls sperm  
471 chemotaxis. *J Cell Biol* 196(5):653–663.
- 472 14. Wadhams GH, Armitage JP (2004) Making sense of it all: bacterial chemotaxis. *Nat Rev*  
473 *Mol cell Biol* 5(12):1024.
- 474 15. Strünker T, et al. (2011) The CatSper channel mediates progesterone-induced Ca<sup>2+</sup> influx  
475 in human sperm. *Nature* 471(7338):382.
- 476 16. Demott RP, Suarez SS (1992) Hyperactivated sperm progress in the mouse oviduct. *Biol*  
477 *Reprod* 46(5):779–785.
- 478 17. Suarez SS (1987) Sperm transport and motility in the mouse oviduct: observations in situ.  
479 *Biol Reprod* 36(1):203–210.

- 480 18. Tulsiani D (2012) *Introduction to mammalian reproduction* (Springer Science & Business  
481 Media).
- 482 19. Suarez SS (2016) Mammalian sperm interactions with the female reproductive tract. *Cell*  
483 *Tissue Res* 363(1):185–194.
- 484 20. Denissenko P, Kantsler V, Smith DJ, Kirkman-Brown J (2012) Human spermatozoa  
485 migration in microchannels reveals boundary-following navigation. *Proc Natl Acad Sci*  
486 109(21):8007–8010.
- 487 21. Zaferani M, Palermo GD, Abbaspourrad A (2019) Strictures of a microchannel impose  
488 fierce competition to select for highly motile sperm. *Sci Adv* 5(2):eaav2111.
- 489 22. Elgeti J, Kaupp UB, Gompper G (2010) Hydrodynamics of sperm cells near surfaces.  
490 *Biophys J* 99(4):1018–1026.
- 491 23. Tung C, et al. (2015) Emergence of upstream swimming via a hydrodynamic transition.  
492 *Phys Rev Lett* 114(10):108102.
- 493 24. Bukatin A, Kukhtevich I, Stoop N, Dunkel J, Kantsler V (2015) Bimodal rheotactic  
494 behavior reflects flagellar beat asymmetry in human sperm cells. *Proc Natl Acad Sci*  
495 112(52):15904–15909.
- 496 25. Elgeti J, Gompper G (2009) Self-propelled rods near surfaces. *EPL (Europhysics Lett)*  
497 85(3):38002.
- 498 26. Li G (2016) Hydrodynamics of swimming microorganisms in complex fluids. Dissertation  
499 (Purdue University).
- 500 27. Berke AP, Turner L, Berg HC, Lauga E (2008) Hydrodynamic attraction of swimming

- 501 microorganisms by surfaces. *Phys Rev Lett* 101(3):38102.
- 502 28. Nosrati R, Graham PJ, Liu Q, Sinton D (2016) Predominance of sperm motion in corners.  
503 *Sci Rep* 6:26669.
- 504 29. Baskaran A, Marchetti MC (2009) Statistical mechanics and hydrodynamics of bacterial  
505 suspensions. *Proc Natl Acad Sci* 106(37):15567–15572.
- 506 30. Brotto T, Caussin J-B, Lauga E, Bartolo D (2013) Hydrodynamics of confined active  
507 fluids. *Phys Rev Lett* 110(3):38101.
- 508 31. Li G, Tang JX (2009) Accumulation of microswimmers near a surface mediated by  
509 collision and rotational Brownian motion. *Phys Rev Lett* 103(7):78101.
- 510 32. Schaar K, Zöttl A, Stark H (2015) Detention times of microswimmers close to surfaces:  
511 Influence of hydrodynamic interactions and noise. *Phys Rev Lett* 115(3):38101.
- 512 33. Ma R, Klindt GS, Riedel-Kruse IH, Jülicher F, Friedrich BM (2014) Active phase and  
513 amplitude fluctuations of flagellar beating. *Phys Rev Lett* 113(4):48101.
- 514 34. Drescher K, Dunkel J, Cisneros LH, Ganguly S, Goldstein RE (2011) Fluid dynamics and  
515 noise in bacterial cell--cell and cell--surface scattering. *Proc Natl Acad Sci*  
516 108(27):10940–10945.
- 517 35. Li G-J, Ardekani AM (2014) Hydrodynamic interaction of microswimmers near a wall.  
518 *Phys Rev E* 90(1):13010.
- 519 36. Takatori SC, Yan W, Brady JF (2014) Swim pressure: stress generation in active matter.  
520 *Phys Rev Lett* 113(2):28103.
- 521 37. Guidobaldi A, et al. (2014) Geometrical guidance and trapping transition of human sperm

- 522 cells. *Phys Rev E* 89(3):32720.
- 523 38. Spagnolie SE, Moreno-Flores GR, Bartolo D, Lauga E (2015) Geometric capture and  
524 escape of a microswimmer colliding with an obstacle. *Soft Matter* 11(17):3396–3411.
- 525 39. Saggiorato G, et al. (2017) Human sperm steer with second harmonics of the flagellar  
526 beat. *Nat Commun* 8(1):1415.
- 527 40. Zaferani M, Cheong SH, Abbaspourrad A (2018) Rheotaxis-based separation of sperm  
528 with progressive motility using a microfluidic corral system. *Proc Natl Acad*  
529 *Sci*:201800819.
- 530 41. Friedrich BM, Riedel-Kruse IH, Howard J, Jülicher F (2010) High-precision tracking of  
531 sperm swimming fine structure provides strong test of resistive force theory. *J Exp Biol*  
532 213(8):1226–1234.
- 533 42. Kim S, Karrila SJ (2013) *Microhydrodynamics: principles and selected applications*  
534 (Courier Corporation).
- 535 43. Lauga E, DiLuzio WR, Whitesides GM, Stone HA (2006) Swimming in circles: motion of  
536 bacteria near solid boundaries. *Biophys J* 90(2):400–412.
- 537 44. Hu J, Wysocki A, Winkler RG, Gompper G (2015) Physical sensing of surface properties  
538 by microswimmers--directing bacterial motion via wall slip. *Sci Rep* 5:9586.
- 539 45. Lemelle L, Palierne J-F, Chatre E, Vaillant C, Place C (2013) Curvature reversal of the  
540 circular motion of swimming bacteria probes for slip at solid/liquid interfaces. *Soft Matter*  
541 9(41):9759–9762.
- 542 46. Di Leonardo R, Dell’Arciprete D, Angelani L, Iebba V (2011) Swimming with an image.

- 543            *Phys Rev Lett* 106(3):38101.
- 544    47.    Saleh B (2011) *Introduction to subsurface imaging* (Cambridge University Press).
- 545    48.    Brokaw CJ, Nagayama SM (1875) Modulation of the Asymmetry of Sea Urchin Sperm  
546            Flagellar Bending by Calmodulin. (35):1875–1883.
- 547    49.    Ignotz GG, Suarez SS (2005) Calcium / Calmodulin and Calmodulin Kinase II Stimulate  
548            Hyperactivation in Demembrated Bovine Sperm 1. 526(May):519–526.
- 549    50.    Smith EF (2002) Regulation of Flagellar Dynein by Calcium and a Role for an Axonemal  
550            Calmodulin and Calmodulin- dependent Kinase. 13(September):3303–3313.
- 551    51.    Freya B, et al. (2018) Direction of flagellum beat propagation is controlled by proximal /  
552            distal outer dynein arm asymmetry. 115(31). doi:10.1073/pnas.1805827115.
- 553    52.    Suarez SS (2008) Control of hyperactivation in sperm. *Hum Reprod Update* 14(6):647–  
554            657.
- 555    53.    Gadêlha H, Gaffney EA, Smith DJ, Kirkman-Brown JC (2010) Nonlinear instability in  
556            flagellar dynamics: a novel modulation mechanism in sperm migration? *J R Soc Interface*  
557            7(53):1689–1697.
- 558    54.    Friedrich BM, Jülicher F (2009) Steering chiral swimmers along noisy helical paths. *Phys*  
559            *Rev Lett* 103(6):68102.
- 560    55.    Shingyoji C, Higuchi H, Yoshimura M, Katayama E, Yanagida T (1998) Dynein arms are  
561            oscillating force generators. *Nature* 393(6686):711.
- 562    56.    Ueno H, Yasunaga T, Shingyoji C, Hirose K (2008) Dynein pulls microtubules without  
563            rotating its stalk. *Proc Natl Acad Sci* 105(50):19702–19707.



- 564 57. Wang Q, et al. (2018) Molecular mechanisms of the interhead coordination by interhead  
565 tension in cytoplasmic dyneins. *Proc Natl Acad Sci* 115(40):10052–10057.
- 566 58. Elgeti J, Winkler RG, Gompper G (2015) Physics of microswimmers—single particle  
567 motion and collective behavior: a review. *Reports Prog Phys* 78(5):56601.
- 568 59. Yeomans JM, Pushkin DO, Shum H (2014) An introduction to the hydrodynamics of  
569 swimming microorganisms. *Eur Phys J Spec Top* 223(9):1771–1785.
- 570 60. Mathijssen AJTM, Pushkin DO, Yeomans JM (2015) Tracer trajectories and displacement  
571 due to a micro-swimmer near a surface. *J Fluid Mech* 773:498–519.
- 572 61. Ishimoto K, Gadêlha H, Gaffney EA, Smith DJ, Kirkman-Brown J (2017) Coarse-graining  
573 the fluid flow around a human sperm. *Phys Rev Lett* 118(12):124501.
- 574 62. Bruus H *Theoretical microfluidics*. 2008 (New York: Oxford University Press).
- 575 63. Nosrati R, Driouchi A, Yip CM, Sinton D (2015) Two-dimensional slither swimming of  
576 sperm within a micrometre of a surface. *Nat Commun* 6:8703.
- 577 64. Wysocki A, Elgeti J, Gompper G (2015) Giant adsorption of microswimmers: duality of  
578 shape asymmetry and wall curvature. *Phys Rev E* 91(5):50302.
- 579 65. Rode S, Elgeti J, Gompper G (2018) Sperm motility in modulated microchannels. *New J*  
580 *Phys*.
- 581 66. Kleppner D, Kolenkow R (2013) *An introduction to mechanics* (Cambridge University  
582 Press).
- 583 67. Guzick DS, et al. (2001) Sperm morphology, motility, and concentration in fertile and  
584 infertile men. *N Engl J Med* 345(19):1388–1393.

- 585 68. Hirano Y, et al. (2001) Andrology: Relationships between sperm motility characteristics  
586 assessed by the computer-aided sperm analysis (CASA) and fertilization rates in vitro. *J*  
587 *Assist Reprod Genet* 18(4):215–220.
- 588 69. Azizi M, et al. (2018) Nanoliter-Sized Microchamber/Microarray Microfluidic Platform  
589 for Antibiotic Susceptibility Testing. *Anal Chem* 90(24):14137.
- 590 70. Azizi M, Zaferani M, Cheong SH, Abbaspourrad A Pathogenic Bacteria Detection Using  
591 RNA-Based Loop-Mediated Isothermal-Amplification-Assisted Nucleic Acid  
592 Amplification via Droplet Microfluidics. *ACS sensors*.
- 593 71. Oppenheim A V (1999) *Discrete-time signal processing* (Pearson Education India).

594

595

596

597

598

599

600

601

602

603

604  
605  
606  
607  
608  
609  
610  
611  
612  
613  
614  
615  
616  
617  
618  
619  
620  
621  
622  
623  
624  
625

## Supplementary Information

### **Effect of flagellar beating pattern on sperm rheotaxis and boundary-dependent navigation**

Meisam Zaferani<sup>1</sup>, Farhad Javi<sup>1</sup>, Amir Mokhtare<sup>1</sup>, Alireza Abbaspourrad<sup>1†</sup>

<sup>1</sup> Department of Food Science, College of Agriculture and Life Sciences, Cornell University, Ithaca, NY, 14850, USA

† Corresponding author: [alireza@cornell.edu](mailto:alireza@cornell.edu)

#### **I. Reconstruction of sperm beating patterns and Fourier analysis**

To model beating patterns that resemble that of the sperm flagella, we studied the pattern in one cycle of flagellar beating using a traveling sine wave with a temporal phase of  $\phi(t) = \omega t$  (with  $\omega = 40\pi$  Hz as the angular frequency) in the range of  $\pi - \phi_0 \leq \phi(t) \leq \phi_0$  so that  $\phi_0 \in [\pi, 2\pi]$ . In turn, we constructed the even extension of the partial sine wave to form the flagellar beating function over time. Fig. S1 shows these constructed patterns, which resemble the flagellar beating of the sperm observed inside the quiescent zone. Here, the completely symmetric beating ( $\phi_0 = 2\pi$ ) corresponds to sperm with absolute progressive motion, while asymmetry within the flagellum motion ( $\phi_0 < 2\pi$ ) results in intrinsic circular motion. To analyze the beating patterns and the resulting sperm motion, we applied the Fourier transform to yield the temporal frequencies (Fig. S2). Interestingly, with increasing temporal asymmetry in the beating pattern, the frequency of the main (first) harmonic increases while its amplitude decreases. Moreover, the zeroth and second harmonics simultaneously appear in the frequency domain.

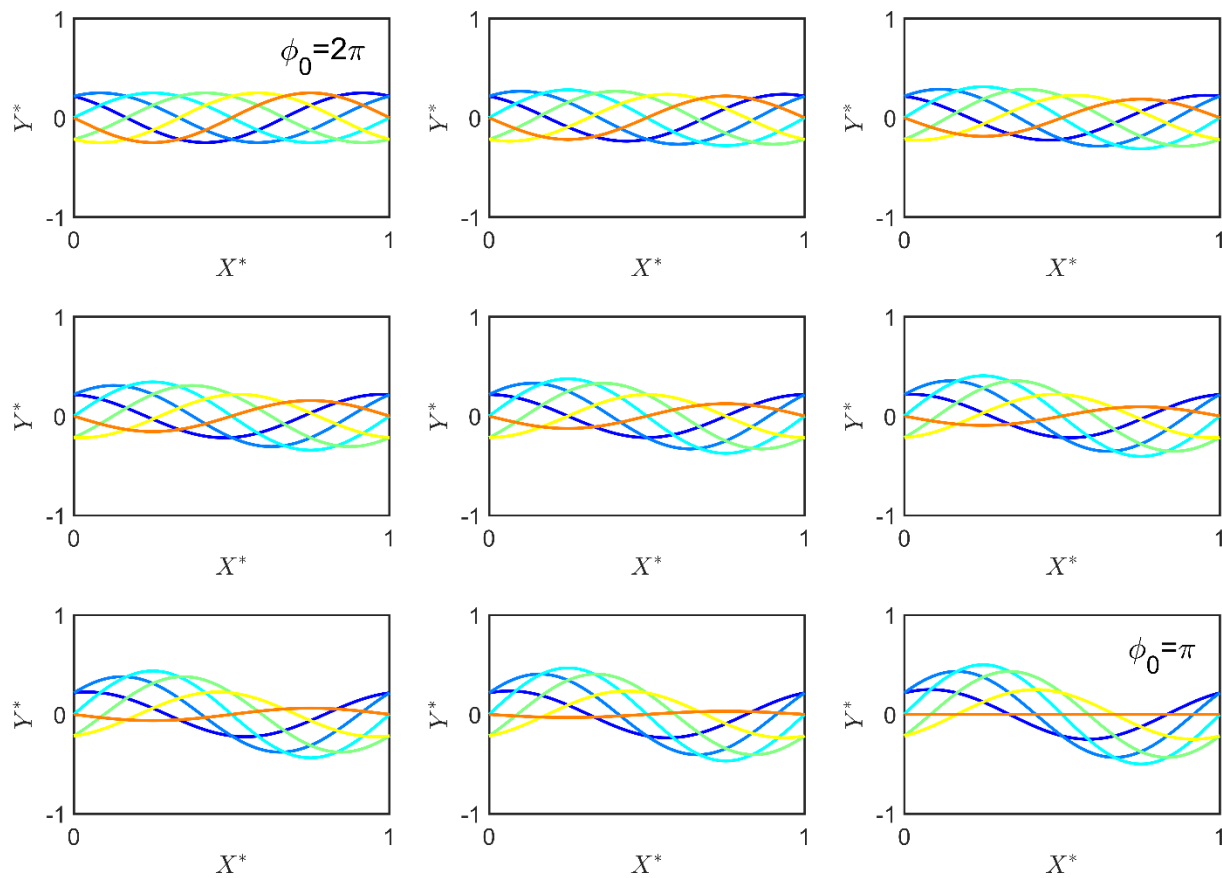

**Fig. S1. The beating pattern of the sperm flagellum.** The  $\phi_0 = 2\pi$  situation corresponds to symmetric beating, and thus absolute progressive motility. As  $\phi_0$  decreases, asymmetry in the beating emerges and the motility includes a circular motion.  $x^*$  and  $y^*$  are normalized  $x$  and  $y$  axes as the sperm motion can be described in 2D Cartesian system.

626

627

628

629

630

631

632

633

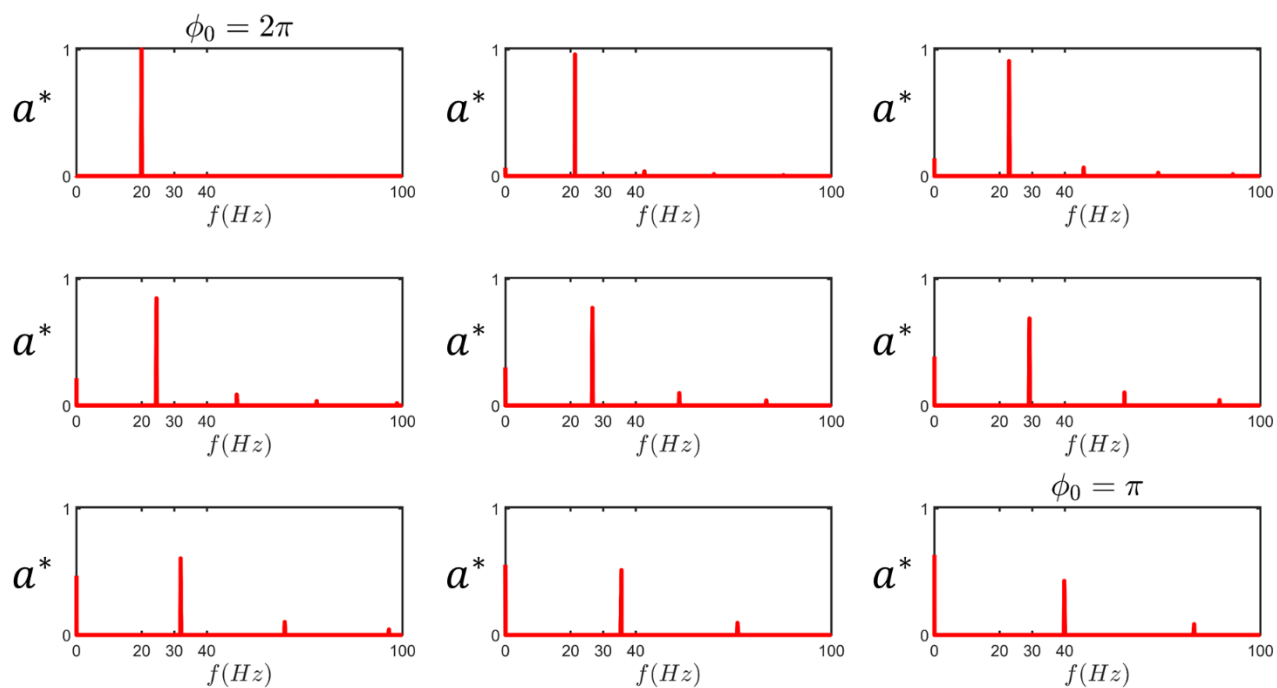

**Fig. S2. The harmonics of the sperm beating.** At  $\phi_0 = 2\pi$ , the beating pattern comprises a single frequency equal to 20 Hz. As asymmetry emerges in the beating, the main frequency shifts and higher harmonics along with the zeroth harmonic appear in the spectrum.  $a^*$  is the normalized amplitude of the harmonics.

634

635

636

637

638

639

640

641

642

643

## 644 II. Resistive force theory

645 In this section we use resistive force theory to derive equations describing the forces produced by  
646 each segment of the flagellum and follow the presentation by Friedrich *et al.* (ref 41) and  
647 Saggiorato *et al.*(ref 39). The velocity of each segment in the y direction ( $V$ ) can be decomposed  
648 into its tangential and normal components,  $V_T$  and  $V_N$ , using  $\alpha$ , which is the tangential angle (S1–  
649 4).

$$650 \quad V = \frac{\partial y}{\partial t} \quad (S1).$$

$$651 \quad V_T = V \sin \alpha \quad (S2)$$

$$652 \quad V_N = V \cos \alpha \quad (S3)$$

$$653 \quad \tan \alpha = \frac{\partial y}{\partial x} \quad (S4)$$

654 Relying upon resistive force theory, the forces produced by each element in the tangential and  
655 normal directions are linearly related to the velocity in those directions:

$$656 \quad f_T = -\xi_T V_T \quad (S5)$$

$$657 \quad f_N = -\xi_N V_N \quad (S6).$$

658 In which,  $\xi_T$  and  $\xi_N$  are drag coefficients in the tangential and normal directions. Since the  
659 amplitude of all harmonics are small in comparison to the sperm length, we can make the following  
660 assumptions:

$$661 \quad \forall n, a_n \ll L \rightarrow \tan \alpha \approx \sin \alpha \approx \alpha \quad (S7)$$

$$662 \quad \cos \alpha \approx \left(1 - \frac{\alpha^2}{2}\right) \quad (S8).$$

663 Using the approximations in Eq. S7–8, we can write out the tangential and normal velocities and  
664 forces using Eq. S9–12.

$$665 \quad V_T \approx \left(\frac{\partial y}{\partial t}\right) \left(\frac{\partial y}{\partial x}\right) \quad (S9)$$

666 
$$V_N \approx \left(\frac{\partial y}{\partial t}\right) \left(1 - \frac{1}{2} \left(\frac{\partial y}{\partial x}\right)^2\right) \quad (S10)$$

667 
$$f_T = -\xi_T \left(\frac{\partial y}{\partial t}\right) \left(\frac{\partial y}{\partial x}\right) \quad (S11)$$

668 
$$f_N = -\xi_N \left(\frac{\partial y}{\partial t}\right) \left(1 - \frac{1}{2} \left(\frac{\partial y}{\partial x}\right)^2\right) \quad (S12)$$

669

670

671

672

673

674

675

676

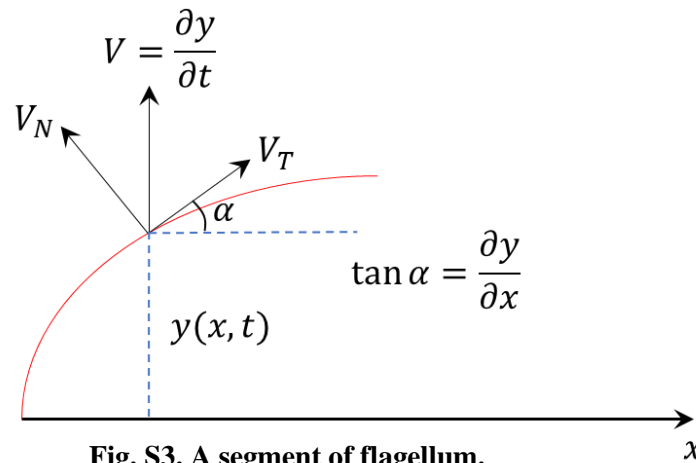

677

**Fig. S3. A segment of flagellum.**

678

679 The force produced by each segment in the x and y directions are described by Eq. S13–14.

680 
$$f_x = f_T \cos \alpha - f_N \sin \alpha \quad (S13)$$

681 
$$f_y = f_T \sin \alpha + f_N \cos \alpha \quad (S14)$$

682 Plugging Eq. S7, 11–12 into Eq. S13–14:

683 
$$f_x = -\xi_T \left(\frac{\partial y}{\partial t}\right) \left(\frac{\partial y}{\partial x}\right) \left(1 - \frac{1}{2} \left(\frac{\partial y}{\partial x}\right)^2\right) + \xi_N \left(\frac{\partial y}{\partial t}\right) \left(\frac{\partial y}{\partial x}\right) \left(1 - \frac{1}{2} \left(\frac{\partial y}{\partial x}\right)^2\right) \quad (S15)$$

684 
$$f_y = -\xi_T \left(\frac{\partial y}{\partial t}\right) \left(\frac{\partial y}{\partial x}\right)^2 + -\xi_N \left(\frac{\partial y}{\partial t}\right) \left(1 - \frac{1}{2} \left(\frac{\partial y}{\partial x}\right)^2\right) \left(1 - \frac{1}{2} \left(\frac{\partial y}{\partial x}\right)^2\right) \quad (S16),$$

685 yields Eq. S17–18, which are the forces produced by the flagellum in the x and y directions.

686 
$$f_x = -(\xi_N - \xi_T) \left(\frac{\partial y}{\partial t}\right) \left(\frac{\partial y}{\partial x}\right) \quad (S17)$$

687 
$$f_y = -\xi_N \left(\frac{\partial y}{\partial t}\right) + (\xi_N - \xi_T) \left(\frac{\partial y}{\partial t}\right) \left(\frac{\partial y}{\partial x}\right)^2 \quad (S18)$$

688

### 689 III. Force and Torque produced by the flagellum

#### 690 1. Force in the x direction

691 The forces produced by a segment of flagellum moving with  $y(x, t)$  in the tangential and normal  
 692 directions can be described by Eq. S17 and S18, where  $\xi_T$  and  $\xi_N$  are the corresponding drag  
 693 coefficients. Plugging Eq. S19 into Eq. S17 yields Eq. S20.

$$694 \quad y(x, t) = \sum_{n=0} a_n \cos(n\omega t - kx) \quad (S19)$$

$$695 \quad f_x = (\xi_N - \xi_T) \left( \sum_{n=0} a_n (n\omega) \sin(n\omega t - kx) \right) \cdot \left( \sum_{n=0} -a_n k \sin(n\omega t - kx) \right) \quad (S20)$$

$$696 \quad f_x = -k\omega(\xi_N - \xi_T) \left( \sum_{i,j} i a_i a_j \sin(i\omega t - kx) \sin(j\omega t - kx) \right) \quad (S21)$$

697 For  $i \neq j$ , the time average of  $f_x$  would be zero, thus we only retain terms with  $i = j$ . This yields  
 698 Eq. S22–23.

$$699 \quad f_x = -k\omega(\xi_N - \xi_T) \left( \sum_{n=1} n a_n^2 \sin^2(i\omega t - kx) \right) \quad (S22)$$

$$700 \quad f_x = -\frac{1}{2} k\omega(\xi_N - \xi_T) \left( \sum_{n=1} n a_n^2 (1 - \cos 2(i\omega t - kx)) \right) \quad (S23)$$

701 By calculating the time average of Eq. S23, the average force produced by each segment of the  
 702 flagellum in the x direction can be described by Eq. S24.

$$703 \quad \tilde{f}_x = \frac{1}{T} \int_0^T f_x dt = -\frac{1}{2} k\omega(\xi_N - \xi_T) \sum_{n=1} n \tilde{a}_n^2 \quad (S24)$$

704 Integrating the  $\tilde{f}_x$  over the flagellum, the total force and velocity produced in the x direction is:

$$705 \quad \tilde{F}_x = L \tilde{f}_x = -\frac{1}{2} k\omega L (\xi_N - \xi_T) \sum_{n=1} n \tilde{a}_n^2 = -\xi_T \tilde{V}_p L \rightarrow \tilde{V}_p = \frac{1}{2} k\omega \left( \frac{\xi_N}{\xi_T} - 1 \right) \sum_{n=1} n \tilde{a}_n^2 \quad (33).$$



706 **2. Force in the y direction and the corresponding torque**

707 Plugging Eq. S19 into Eq. S18 yields Eq. S25.

$$708 \quad f_y = -(\xi_N - \xi_T) \left( \sum_{n=0} a_n(n\omega) \sin(n\omega t - kx) \right) \cdot \left( \sum_{n=0} a_n k \sin(n\omega t - kx) \right)^2 \quad (S25)$$

$$709 \quad f_y = -k^2\omega(\xi_N - \xi_T) \left( \sum_{n=0} n a_n \sin(n\omega t - kx) \right) \cdot \left( \sum_{i,j} a_i a_j \sin(i\omega t - kx) \sin(j\omega t - kx) \right) \quad (S26)$$

710 One can write out Eq. S26 in the form of Eq. S27.

$$711 \quad f_y = -k^2\omega(\xi_N - \xi_T) \left( \sum_{n,i,j} n a_n a_i a_j \sin(n\omega t - kx) \sin(i\omega t - kx) \sin(j\omega t - kx) \right) \quad (S27)$$

712 Since we are interested in time average values of  $f_y$ , the following terms of Eq. S27 are non-zero:

$$713 \quad i = 0, j = n$$

$$714 \quad j = 0, i = n$$

715 Therefore, Eq. S27 reduces to Eq. S28–29:

$$716 \quad f_y = -2a_0 k^2 \omega (\xi_N - \xi_T) \sin(-kx) \left( \sum_n n a_n^2 \sin^2(n\omega t - kx) \right) \quad (S28).$$

$$717 \quad f_y = a_0 k^2 \omega (\xi_N - \xi_T) \sin(kx) \left( \sum_n n a_n^2 (1 - \cos 2(n\omega t - kx)) \right) \quad (S29)$$

718 Taking the average of Eq. S28, the average force produced by each segment in the y direction is:

$$719 \quad \boxed{\tilde{f}_y = \frac{1}{T} \int_0^T f_y dt = (\xi_N - \xi_T) \omega k^2 a_0 \sin(kx) \sum_{n=0} n \tilde{a}_n^2} \quad (S30).$$

721

722 Interestingly, but not surprisingly, the force produced by each segment of the flagellum in the y  
 723 direction is a function of x, meaning that the effect of the zeroth harmonic can be seen in the force  
 724 produced in the y direction.

725 Integrating the forces produced by each segment in the y direction over the flagellum, the total  
 726 force produced in the y direction becomes zero:

$$727 \quad \tilde{F}_y = \int_0^L \tilde{f}_y dx = 0 \quad (S31).$$

728 However, the total force produced in the front half of the sperm is non-zero and equal to the force  
 729 produced in the rear half of the sperm:

$$730 \quad \tilde{F}_{yF} = \int_0^{\frac{L}{2}} \tilde{f}_y dx = 2(\xi_N - \xi_T)\omega ka_0 \sum_{n=0} n \tilde{a}_n^2 \quad (S32)$$

$$731 \quad \tilde{F}_{yB} = -2(\xi_N - \xi_T)\omega ka_0 \sum_{n=0} n \tilde{a}_n^2 \quad (S33).$$

732 We calculated these two forces for the  $\gamma$  ratio, which is required for the Stokeslet description of  
 733 the microswimmer model. Although the total force produced in the y direction is zero, the torque  
 734 produced by the flagellum is not zero:

$$735 \quad \tau_f = \int (x - x_{CM}) \tilde{f}_N dx = (\xi_N - \xi_T)\omega kL \tilde{a}_0 \sum_N n \tilde{a}_n^2 \quad (S34).$$

736 To find the angular velocity of the sperm  $\tilde{\Omega}$ , we need to calculate the torque produced by drag as  
 737 well:

$$738 \quad \tau_d = - \int (x - x_{CM})^2 \xi_N \tilde{\Omega} dx = -\xi_N \tilde{\Omega} \frac{L^3}{12} \quad (S35).$$

739 Considering the zero net-torque condition, we can simply find the angular velocity of the sperm:

740

$$\tau_f + \tau_d = 0 \rightarrow \tilde{\Omega} = \frac{12 (\xi_N - \xi_T) \omega k L \tilde{a}_0}{\xi_N L^3} \sum_N n \tilde{a}_n^2 = \frac{\xi_T}{\xi_N} \left( \frac{24 \tilde{a}_0}{L^2} \tilde{V}_p \right) \quad (S36).$$

743

744 Since the curvature of the sperm trajectory is described by  $\tilde{\Omega} \tilde{V}_p^{-1}$  (in which  $\tilde{\Omega}$  is the angular  
745 velocity of the sperm and  $\tilde{V}_p$  is the sperm velocity), the curvature can be defined as:

746

$$\tilde{\kappa} = \frac{\tilde{\Omega}}{\tilde{V}_p} = \frac{24 \tilde{a}_0}{L^2} \left( \frac{\xi_T}{\xi_N} \right) \quad (S37).$$

747

748

749 In turn, one can write out the  $\gamma$  ratio as:

$$\gamma = \frac{\tilde{F}_{NF}}{2\tilde{F}_T} = \frac{2a_0}{L} \quad (S38)$$

752

753

754

755

756

757

758

759

760

761

762

763

764 **IV. The analytic solution for the swimmer model using the Stokeslet description**

765 The velocity field imposed by a source point is known as the Stokeslet (Eq. S39), i.e., the most  
 766 fundamental solution for the Stokes equation. Based on the linearity in the Stokes equation, the  
 767 contribution of the actively swimming sperm on the fluid flow can be described by superimposing  
 768 the flow fields produced by each point force. For the sake of simplicity, we write out the imposed  
 769 velocity field in three terms, including:

- 770 1) The velocity field imposed by  $\vec{f}$  and  $-\vec{f}$  (Eq. S40),  
 771 2)  $\vec{f}'$  and  $-\vec{f}'$  (Eq. S41), and  
 772 3)  $\vec{f}''$  and  $-\vec{f}''$  (Eq. S42). In which the magnitude of  $\vec{f}'$  and  $\vec{f}''$  are equal to  $\gamma\vec{f}$ .

773 
$$\vec{u}_f = \frac{1}{8\pi\mu} \left\{ \frac{\vec{f}}{r} + \frac{(\vec{f} \cdot \vec{r})\vec{r}}{r^3} \right\} \quad (S39)$$

774 
$$\vec{u}_{\{f,-f\}} = \vec{u}_f + \vec{u}_{-f} = \frac{p\vec{r}}{8\pi\mu r^3} \{-1 + 3 \cos^2 \varphi\} \quad (S40)$$

775 
$$\vec{u}_{\{f',-f'\}} = \frac{1}{8\pi\mu r^3} \left\{ \vec{f}' r d \cos \varphi - f' r \sin \varphi \vec{d} + \frac{3 r d \cos \varphi}{r^2} f' r \sin \varphi \vec{r} \right\} \quad (S41)$$

776 
$$\vec{u}_{\{f'',-f''\}} = \frac{1}{8\pi\mu r^3} \left\{ \vec{f}'' r d' \cos(\varphi + \Delta\theta) - f'' r \sin(\varphi + \Delta\theta) \vec{d}' - \frac{3}{2} f'' d' \sin(2\varphi + 2\Delta\theta) \right\} \quad (S42)$$

777 Using Eq. S40, S41, and S42, the velocity field imposed by the swimmer model is:

778 
$$\vec{u}_T = \frac{p}{8\pi\mu r^2} \{ A \hat{r} + (\bar{I} \cos(\varphi) - \bar{B} \cos(\varphi + \Delta\theta)) \gamma \hat{f}' - (\bar{I} \sin(\varphi) - \bar{B} \sin(\varphi + \Delta\theta)) \gamma \hat{d} \} \quad (S43)$$

779 with

780 
$$A = -1 + 3 \cos^2 \varphi + \frac{3}{2} (\sin(2\varphi) - \sin(2\varphi + 2\Delta\theta))$$

781 
$$\bar{B} = \begin{bmatrix} \cos \Delta\theta & -\sin \Delta\theta \\ \sin \Delta\theta & \cos \Delta\theta \end{bmatrix} \text{ and } \bar{I} = \begin{bmatrix} 1 & 0 \\ 0 & 1 \end{bmatrix}.$$

782

783 The influence of the no-slip boundary condition on the imposed flow is modeled by the mirror  
784 image of the swimmer in the boundary. Accordingly, the velocity field imposed on the sperm that  
785 causes the far-field attraction toward the wall is  $u_T$  with  $r = 2h$ , in which  $h$  is the distance between  
786 the sperm and the wall. For  $\varphi = \pi/2$ ,  $A = -1 + \frac{3}{2}\cos(2\Delta\theta)$ ,

$$787 \quad u_y = \frac{p}{32\pi\mu h^2} \left\{ 1 - \frac{3}{2}\cos(2\Delta\theta) + \frac{\gamma}{2}\sin(2\Delta\theta) \right\} \quad (S44)$$

788 is the attractive velocity field imposed on the swimmer by the wall. This equation can also be  
789 written out as:

$$790 \quad u_y = u_y^p \left( -2 + 3\cos(2\widetilde{\Delta\theta}) - \gamma\sin(2\widetilde{\Delta\theta}) \right) \quad (S45).$$

791 Interestingly, assuming  $\gamma \ll 3$ , at  $\widetilde{\Delta\theta}_n = \frac{1}{2}\cos^{-1}\frac{2}{3} \approx 24.1^\circ$ , the swimmer experiences no attraction  
792 toward the walls and becomes neutral. Given the relation between  $\widetilde{\Delta\theta}$ ,  $\tilde{\kappa}$ , and  $\tilde{V}_p$ , the corresponding  
793 curvature that is inversely related to the progressive velocity is:

$$794 \quad \tilde{\kappa}_n = \frac{\omega}{4\pi\tilde{V}_p} \cos^{-1}\frac{2}{3} \quad (S46).$$

795

796

797

798

799

800

801

802

803

804 **V. The flow field produced by the progressive motility and circular motion.**

805 The flow field produced by the swimmer model in Fig. 4 is the superposition of the flow field  
806 produced by the components of progressive motility ( $\vec{f}$ ) and circular motion ( $\vec{f}''$  and  $-\vec{f}''$ ) and  
807 their corresponding drags ( $-\vec{f}, \vec{f}'$  and  $-\vec{f}'$ ). To identify the mechanism of reduction in the far-field  
808 attraction with the components of circular motion, we simulated the progressive term with  
809 corresponding drag (Fig. S4(A)) and the components of circular motion with corresponding drags  
810 (Fig. S4(B)), separately. Similar to Fig. 4 in the manuscript, the arrows show the normalized  
811 vector field while the magnitude of the flow is represented in color.

812

813

814

815

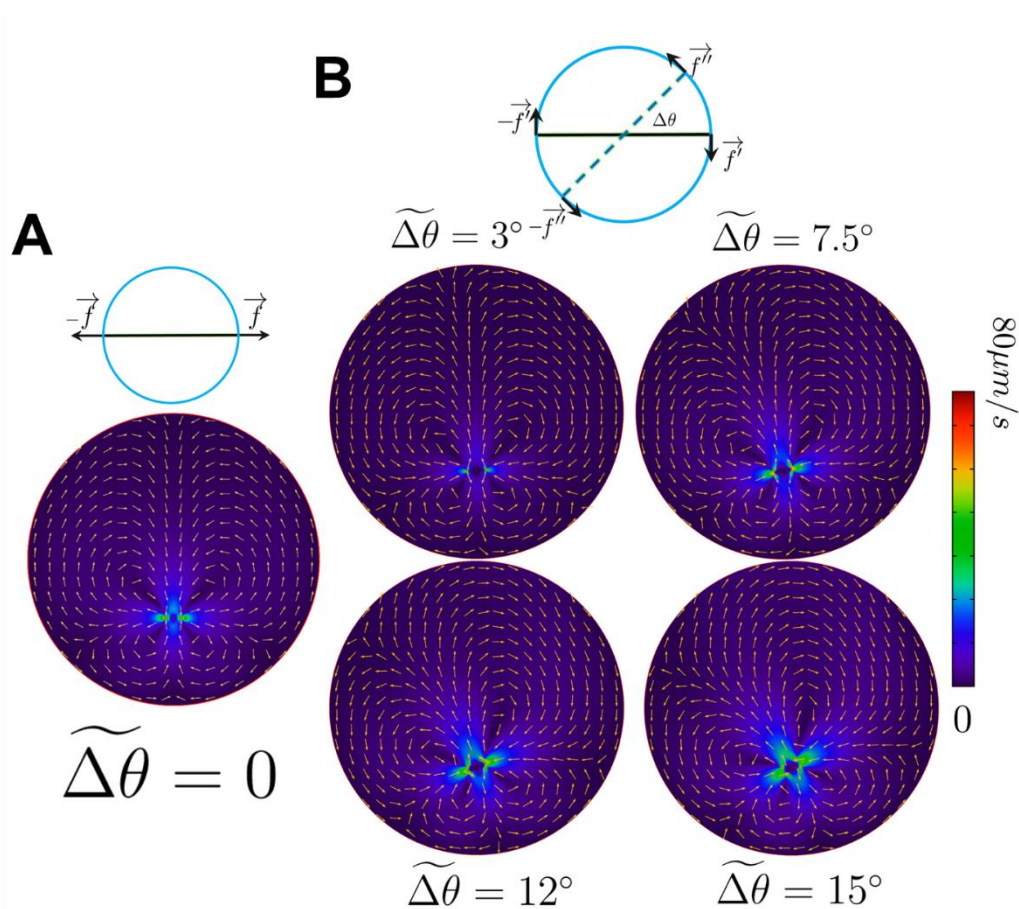

**Fig. S4. The flow field produced by the components of the progressive motility and the circular motion.** (A) The flow produced by the progressive component of motility and its corresponding drag. (B) The flow produced by the components of circular motion and their corresponding drags,  $\Delta\theta$ , ranging from  $3^\circ$  to  $15^\circ$ . The arrows are the normalized direction while the colors represent the magnitude of the velocity field.

816

817

818

819

820

821

## 822 **VI. Lubrication approximation**

823 The stress tensor is

$$824 \quad \bar{\sigma} = -p\bar{l} + \mu(\nabla u^T + \nabla u) \quad (S47).$$

825 At distances adequately close to the wall, the contribution of the pressure dominates and  $\sigma \approx -p\bar{l}$ .

826 Accordingly, the torque exerted on the sperm by the boundary can be written out as

$$827 \quad \tau = \int -p(x - x_{CM})dx \quad (S48).$$

828 Neglecting the sperm mass, the net torque applied on the sperm is equal to zero, meaning that the

829 drag torque cancels out the torque exerted by the wall. This constraint gives us

$$830 \quad \frac{d\beta}{dt} = \frac{1}{\xi_N} \frac{\int p(x - x_{CM})dx}{\int (x - x_{CM})^2} \quad (S49),$$

831 in which  $\beta$  is the angle of the sperm swimming direction with respect to the wall.

832

833
